# Supplementary material for: Assessing the pharmaceutical care provision to suspected COVID-19 patients in community pharmacies: a simulated patient study
Source: Springer Nature journal article supplement (doi:10.1186/s12913-022-07870-1), 2022-04-09
Supplement: MOESM1 [file 20298948]

**Additional File 1.** Data Collection Form

**Assessing the Pharmaceutical Care Provision to Suspected COVID-19 Patients in Community Pharmacies: A Simulated Patient Study**

**Authors:** Samar Karout<sup>1</sup>, Hani M J Khojah<sup>2</sup>, Rania Itani<sup>1\*</sup>, Fatima Jaffal<sup>1</sup>, Abdalla El-Lakany<sup>3</sup>

**Form Code:** \_\_\_\_\_

**Visiting Information:**

| Day | Mon. | Year | Hour | Min. | Time                                                 | Duration Spent (Minutes) |
|-----|------|------|------|------|------------------------------------------------------|--------------------------|
|     |      | 2021 |      |      | <input type="radio"/> AM<br><input type="radio"/> PM |                          |

**Pharmacy Information**

|             |  |               |  |
|-------------|--|---------------|--|
| <b>Code</b> |  | <b>Street</b> |  |
|-------------|--|---------------|--|

**Encountered pharmacist Information**

**Encountered pharmacist gender:**       Male                               Female

**Pharmacist's estimated age:**

- 22 – 29 years
- 30 – 39 years
- 40 – 49 years
- 50 – 59 years
- ≥ 60

**Method of communication with the pharmacist:**

- Direct contact inside the Pharmacy
- Through a protection screen (e.g., plexi-glass) inside the pharmacy
- Through Dispensing window outside the pharmacy

**Estimated Average size of the pharmacy:**

- Small (32m<sup>2</sup>-70m<sup>2</sup>)       Medium (70m<sup>2</sup>-100m<sup>2</sup>)       Large (>100m<sup>2</sup>)       Could not estimate

**Number of staff at the time of visit:** \_\_\_\_\_

**Number of customers at the time of visit** (inside or outside): \_\_\_\_\_

**Estimated dispensary load:**

- Busy (< 5 customers waiting)
- Moderate (2–5 customers waiting)
- Slow (1–2 customers waiting)
- Quiet (Nil customers)

**Relevant medical data asked by the encountered pharmacist**

**A. Patient Information**

- Age
- Pregnancy/lactation
- Occupation (to rule out high-risk occupations, such as HCP, LTCF)
- Residence and members sharing living
- Medical comorbidities (Do you suffer from any medical disease?)
- Medication history (Do you take any chronic medication?)
- **None of the above**

**B. Assessment of COVID-19 Exposure**

- Close contact with someone with symptoms, diagnosed OR tested positive for COVID-19, in two weeks before feeling sick
- Travel history
- Attending a social gathering, or was in crowded indoor settings (with more than 10 people without universal mask wearing and/or physical distancing)
- **None of the above**

**C. COVID-19 related Symptoms & Management**

- Nature of symptoms (Can include fever, cough, shortness of breath, diarrhea/GI, headache, muscle ache, chills, sore throat, vomiting, abdominal pain, nasal congestion, loss of smell, loss of taste, malaise, and fatigue)
- Onset and duration of symptoms (When did the symptoms start?)
- Life-threatening symptoms (red flag symptoms, such as severe dyspnea, persistent chest pain, new confusion, inability to wake up or stay awake, bluish lips or face)
- Medications used to cope with those symptoms (Have you tried any treatment?)
- Previous PCR test (date and results of PCR, if applicable)
- History of Flu vaccination
- Others, \_\_\_\_\_
- **None of the above**

**Pharmacist Responses to the patient's situation (Select all that apply):**

**First Response:**

- Advised to do a PCR test

**Medical Attention:**

- Advised to seek medical attention
- Referred to a specific healthcare facility, e.g. private clinic having a contract with the pharmacy

**Other Responses:**

- Asked the patient to leave the pharmacy and refused to talk
- Called the Ministry of Health (MOPH)
- Stated that he/she cannot help
- Advised the patient to isolate herself for 14 days
- Measured the patient's body temperature
- Emphasized on the importance of avoiding the use of antimicrobials (e.g. antibiotics, antivirals) without a prescription
- Requested a prescription to sell any claimed medications for COVID-19
- Educated about COVID-19, typical symptoms and measures to prevent transmission
- Advised to stick to PPE (mask, disinfectant, gloves...)
- Recommended non-pharmacological measure(s): \_\_\_\_\_
- Advised to monitor red-flag symptoms
- Recommended an antipyretic for fever
- Recommended other medication(s)
- Recommended a dietary supplement
- Recommended a flu vaccine
- Asked the patient to keep a distance from the dispensary counter
- Asked the patient to take distance from other clients present in the pharmacy
- Started disinfecting the area once he/she suspected about a COVID-19 case
- Informed patients and other staff about the suspected case
- Other related responses: \_\_\_\_\_
- None of the above**

**If recommended a medication: (Select all that apply)**

**Medications prescribed:**

- |                                          |                                          |                                        |
|------------------------------------------|------------------------------------------|----------------------------------------|
| <input type="checkbox"/> Antibiotic      | <input type="checkbox"/> Antiviral       | <input type="checkbox"/> Antihistamine |
| <input type="checkbox"/> Pseudoephedrine | <input type="checkbox"/> Corticosteroids | <input type="checkbox"/> Antitussive   |

**Antipyretic**

- Paracetamol
- NSAIDs

**Dietary Supplements**

- |                                    |                                            |                               |
|------------------------------------|--------------------------------------------|-------------------------------|
| <input type="checkbox"/> Vitamin D | <input type="checkbox"/> Vitamin C         | <input type="checkbox"/> Zinc |
| <input type="checkbox"/> Vitamin E | <input type="checkbox"/> Vitamin B complex |                               |

**Intranasal products**

- |                                                  |                                                     |
|--------------------------------------------------|-----------------------------------------------------|
| <input type="checkbox"/> Intranasal Saline       | <input type="checkbox"/> Intranasal Corticosteroids |
| <input type="checkbox"/> Intranasal Decongestant | <input type="checkbox"/> Intranasal Antihistamine   |

**Others:** \_\_\_\_\_

**First medication (Specify the medication being recommended):**

Brand Name:

Dose:

Dosage form:

**\* Information being provided by the pharmacist about the recommended medication**

- Indication; \_\_\_\_\_
- Mode of action; \_\_\_\_\_
- Dosage regimen: \_\_\_\_\_
- Duration of use; \_\_\_\_\_
- Side effects: \_\_\_\_\_

**Second medication (Specify the medication being recommended):**

Brand Name:

Dose:

Dosage form:

**\* Information being provided by the pharmacist about the recommended medication**

- Indication; \_\_\_\_\_
- Mode of action; \_\_\_\_\_
- Dosage regimen: \_\_\_\_\_
- Duration of use; \_\_\_\_\_
- Side effects: \_\_\_\_\_

## Pharmacist's Communication Skills

| Category                        | 1                                                   | 2                                                                             | 3                                                                                             | 4                                                                                      | Score |
|---------------------------------|-----------------------------------------------------|-------------------------------------------------------------------------------|-----------------------------------------------------------------------------------------------|----------------------------------------------------------------------------------------|-------|
| <b>Eye contact with patient</b> | Made no eye contact                                 | Made some eye contact                                                         | Made eye contact, but disengaged several times                                                | Maintained appropriate eye contact throughout interview                                |       |
| <b>Nonverbal communication</b>  | Leaned away from patient with arms crossed          | Leaned away from patient                                                      | Leaned toward patient, but was either too far or too close to patient                         | Leaned toward patient from a safe distance                                             |       |
| <b>Listening</b>                | Appeared to be consistently distracted              | Was occasionally distracted                                                   | Was not distracted, but did not seem to be fully engaged with patient                         | Listened actively to patient at all times                                              |       |
| <b>Questions</b>                | Asked appropriate questions                         | Asked appropriate questions, but none were open-ended                         | Asked appropriate, open-ended questions, but some were not understandable                     | Asked questions which were appropriate, open-ended, and understandable                 |       |
| <b>Concern</b>                  | Appeared hurried and/or not interested in patient   | Took the necessary time, but did not seem interested in the patient           | Showed some interest in the patient but inconsistently                                        | Showed consistent interest and concern towards the patient                             |       |
| <b>Organization</b>             | Seemed totally unprepared                           | Seemed prepared, but carried out interview in a random manner                 | Seemed prepared and somewhat sequential                                                       | Demonstrated a prepared, well-organized, sequential approach to the interview          |       |
| <b>Empathy</b>                  | Showed no interest in the patient's emotional needs | Showed interest in the patient's emotional needs, but did not respond to them | Responded to the patient's emotional needs, but lacked warmth and sincerity                   | Demonstrated appropriate, sincere interest in the patient's emotional needs            |       |
| <b>Closure</b>                  | Ended interview abruptly                            | Effectively ended interview, but did not summarize patient's concerns         | Summarized patient's concerns, but did not ask if patient had any other concerns or questions | Summarized patient's concerns and asked if patient had any other concerns or questions |       |
| <b>Total Score</b>              |                                                     |                                                                               |                                                                                               |                                                                                        |       |
